# Supplementary material
Source: publisher site journal article supplement (https://www.dovepress.com/article/454039)
Supplement: Supplementary file 1 [file get_supplementary_file.php]

**Supplement Table 1.** Distribution of answers in the Knowledge dimension.

| Knowledge | Correct/Know |
| --- | --- |
| 1. Dabigatran and Rivaroxaban have a lower risk of causing intracerebral haemorrhage than Warfarin. | 223(41.6) |
| 2. Intracerebral haemorrhage is one of the serious and even fatal complications for patients taking anticoagulants. | 411(76.68) |
| 3. Strokes can be divided into haemorrhagic strokes, with haemorrhagic strokes are also known as intracerebral haemorrhage (suffusion of blood on the brain), and ischaemic strokes. | 229(42.72) |
| 4. Which of the following triggers of intracerebral haemorrhage do you know? |  |
| 4.1 Emotional stress, mental stimulation | 443(82.65) |
| 4.2 Overworking | 307(57.28) |
| 4.3 Alcohol abuse | 394(73.51) |
| 4.4 Overexertion | 275(51.31) |
| 4.5 Climate change | 169(31.53) |
| 5. During the period of taking oral anticoagulants, if the following clinical manifestations occur, it might be a symptom of intracerebral haemorrhage and the emergency clinic or ambulance should be called immediately: | 335(62.5) |
| 5.1 Severe headache. For patients taking oral anticoagulants, the sudden onset of severe headache should be taken seriously | 251(46.83) |
| 5.2 Nausea and vomiting. Especially projectile vomiting | 357(66.6) |
| 5.3 Hemiplegia. For patients taking oral anticoagulants, the sudden onset of weakness in one limb, or deflection of mouth angle should be taken seriously | 388(72.39) |
| 5.4 Seizures. Studies have shown that intracerebral haemorrhage may lead to seizures | 303(56.53) |
| 6. During the period of taking oral anticoagulants, avoid injury and contact your doctor immediately if there are signs of bleeding, such as blood in the stool or in a dark brown color; persistent bleeding from the gums, nose or other sites; dark red or brown urine; excessive menstruation, etc. | 161(30.04) * |

* Number of people who responded that they know.

**Supplement Table 2.** Distribution of answers in the Attitude dimension.

|  | Strongly agree | Agree | Neutral | Disagree | Strongly disagree |
| --- | --- | --- | --- | --- | --- |
| 1. Intracerebral haemorrhage is a very critical condition and early recognition of the premonitory symptoms is very important. | 173(32.28) | 152(28.36) | 31(5.78) | 113(21.08) | 67(12.5) |
| 2. How important do you think it is to regularly monitor coagulation index during the period of taking oral anticoagulants to prevent intracerebral haemorrhage. | 141(26.31) | 142(26.49) | 117(21.83) | 85(15.86) | 51(9.51) |
| 3. How important do you think it is to keep an optimistic and calm mood during the period of taking oral anticoagulants to prevent intracerebral haemorrhage. | 156(29.1) | 138(25.75) | 111(20.71) | 88(16.42) | 43(8.02) |
| 4. How important do you think the cessation of smoking is for prevention of intracerebral haemorrhage. | 157(29.29) | 144(26.87) | 72(13.43) | 121(22.57) | 42(7.84) |
| 5. How important do you think that restriction of alcohol consumption is for prevention of intracerebral haemorrhage. | 138(25.75) | 185(34.51) | 27(5.04) | 129(24.07) | 57(10.63) |
| 6. Do you think that oral anticoagulant medication should continue as prescribed for disease treatment with regular dosing and scheduling despite some dreaded complications such as intracerebral haemorrhage. | 113(21.08) | 137(25.56) | 155(28.92) | 88(16.42) | 43(8.02) |
| 7. Do you think it is very important to take oral anticoagulants on time and in the required dosage as prescribed by your doctor? | 156(29.1) | 164(30.6) | 33(6.16) | 131(24.44) | 52(9.7) |

**Supplement Table 3.** Distribution of answers in the Practice dimension.

|  | Very consistent | Consistent | Neutral | Less consistent | Very inconsistent |
| --- | --- | --- | --- | --- | --- |
| 1. You adhere to regular follow-up visits as prescribed by your doctor while taking oral anticoagulants. | 131(24.44) | 143(26.68) | 127(23.69) | 97(18.1) | 38(7.09) |
| 2. You adhere to regular check-ups as prescribed by your doctor so that your doctor can adjust the dosage of anticoagulants in time. | 133(24.81) | 162(30.22) | 92(17.16) | 114(21.27) | 35(6.53) |
| 3. You keep a positive mind and try to keep yourself calm and happy. | 143(26.68) | 155(28.92) | 116(21.64) | 92(17.16) | 30(5.6) |
| 4. You take care to keep a good lifestyle and avoid overworking. | 137(25.56) | 171(31.9) | 110(20.52) | 89(16.6) | 29(5.41) |
| 5. You keep a daily record of the dosage of oral anticoagulants and inform your doctor at your follow-up visit. | 158(29.48) | 163(30.41) | 84(15.67) | 85(15.86) | 46(8.58) |
| 6. You are careful not to strain too hard to pass stools, eat plenty of vegetables and fruits, and administer a laxative if necessary. | 170(31.72) | 154(28.73) | 36(6.72) | 118(22.01) | 58(10.82) |
| 7. You will seek medical attention promptly if you suddenly experience severe headache, nausea and vomiting, or numbness in your limbs. | 141(26.31) | 209(38.99) | 29(5.41) | 119(22.2) | 38(7.09) |
| 8. You will take the initiative to consult your doctor about precautions for anticoagulation treatment. | 133(24.81) | 143(26.68) | 113(21.08) | 111(20.71) | 36(6.72) |
